# Supplementary material for: A fast and robust hepatocyte quantification algorithm including vein processing
Source: Springer Nature journal article supplement (doi:10.1186/1471-2105-11-124), 2010-03-10
Supplement: 12859_2009_3581_MOESM2_ESM.pdf [file 12859_2009_3581_MOESM2_ESM.pdf]

Load

Smoothing

**Input:** Red/Blue Channel  
**Output:** Smoothed Image

Thresholding

**Input:** Smoothed Masked Image  
**Output:** Hepatocyte and Vein Mask

Connected Components

**Input:** Hepatocyte Mask  
**Output:** Corrected Hepatocyte Mask

Hepatocyte detection

**Input:** Hepatocyte Mask  
**Output:** Circle Mask, Hepatocyte Number

Save

red channel

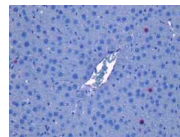

blue channel

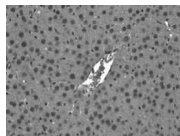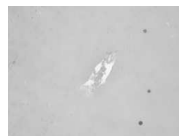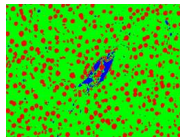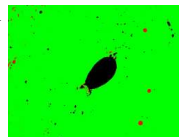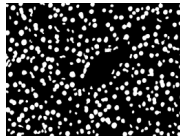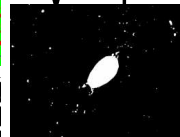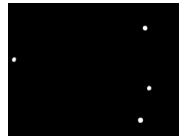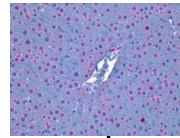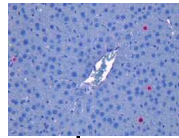

BrdU-LI
